# Supplementary material for: Complex Resistivity Dispersion Characteristics of Water‐Bearing Coal Based on Double Cole‐Cole Model
Source: Hindawi journal article supplement (doi:10.1155/2019/4913767), 2019-01-01
Supplement: f1 [file 4913767.f1.xls]

## Sheet:  bituminous coal
bituminous coal
f/Hz	real part :Rs							imaginary part:X
f/Hz	sw:58%	0.765	0.941	0.952	0.971	0.983	1	sw:58%	0.765	0.941	0.952	0.971	0.983	1
1	368094	152585	105707	99919.8	102175	87116.4	77098.8	85351.4	28872.3	20448.1	23772.4	24123.3	18301.8	13500.2
1.847	352918	154496	103168	96418.8	98233.2	83986.2	74841	84492.5	28547.5	20598.6	24490.9	24737	18604.2	14159.4
3.41	340429	155945	100171	93116.4	94477.8	81059.4	72451.8	79801.2	27385.7	20105.1	24287.3	24590.6	18205.9	14197.9
6.297	323372	152481	97137.6	89664	91061.4	78422.4	70191.6	73083.6	24852.1	18937.6	23088.5	23620.8	17215.2	13647
11.629	313570	148645	94248	86818.8	87745.2	76119	68127	67406.4	21815.7	17204.7	21615.2	21830.2	15782.6	12695.6
21.474	306384	145405	91655.4	84223.2	84767.4	74040	66323.4	61324.8	19523.9	15290.7	19955.8	19735.4	14313.7	11612.6
37.296	301337	143062	89551.8	82073.4	82206.6	72301.8	64803.6	56876.9	18199.7	13761.3	18422.1	17790.1	13137.7	10688.7
64.775	304627	140057	87679.2	79684.2	79554	70873.2	63484.2	60642.8	19246.1	11659.1	16878.1	15919	12561.1	9901.01
119.62	288007	139403	85818.6	77824.8	77466.6	68891.4	61793.4	62412.2	18756.8	11674.1	16130.6	14442.2	11374.7	9134.02
220.89	278898	137758	83978.4	75720	75379.2	66917.4	60256.2	70434.3	20526.6	11386.6	15654.3	13463	10996.4	8719.6
407.9	272508	133832	82144.2	73261.8	72909	65207.4	58591	92031.4	27619.7	11627.7	15103.4	13016.4	10854.2	8474.32
753.25	251701	130183	79968	70329	70737	63021	56948.3	120999	38918.8	13249.5	15367.3	13506.6	11282.1	8748.25
1391	218992	121140	77472	67504.2	68142	60827.4	55178.9	159363	54770.3	15102.9	16281.1	15101.5	12013	9297.28
2568.7	167604	103466	74193.6	64150.2	64986	58451.7	53335.7	175625	70597.6	18287.5	17822.1	18001.3	13458.7	10412.3
4743.4	115376	80123.4	69871.2	60359.4	60661.8	55452.4	51103.4	156537	72924.5	22224.9	20061.8	21730.6	15693.3	12136.5
8759.4	80092.2	60763.8	64236	55821.7	54787.2	51657.3	48343.9	117747	60808.3	26327.3	22754.3	25085.4	18290.5	14492
16176	60264.6	48866.7	57326.7	50030.1	48019.7	47017.4	44849.7	84260.6	46544.8	29838.1	25701.2	26872.6	20955.9	17491.9
29870	47900.2	41127.4	49502.1	43304.4	41195.3	41666.7	40353.7	61434.9	36991.5	32191.5	27667.8	27187.7	23204.4	20328.2
55160	38644.7	34663.1	41126.3	36125.6	34632.4	35695.3	34946.9	47436.2	31504.8	33311.1	28344	26852.1	24806.7	22568.6
101860	30711.2	28380.9	32606.6	28964.1	28171.8	29294.1	28865.3	38356.4	28408.5	32868.8	27785.4	26089.9	25480.6	23942.7
188100	23506.8	22073.1	24192.7	22006.3	21688.6	22613.6	22465.3	31955.9	25865.1	30637.7	25967.8	24760.3	24948	23892.5
200000	22781.6	21444.7	23378.5	21331.3	21049.1	21935	21791.9	31321.6	25582.3	30258.8	25731.2	24538.1	24796.1	23838.4

## Sheet: anthracite
anthracite
f/Hz	real part :Rs							imaginary part:X
f/Hz	sw:42.1%	0.474	0.579	0.789	0.947	0.974	1	sw:42.1%	0.474	0.579	0.789	0.947	0.974	1
1	1218860	885096	408406	391837	274408	205790	215317	284857	203212	114840	86580.9	93828.8	51685	58276.1
1.847	1142210	814872	381159	372932	255942	195196	200681	274687	188251	107012	83466.4	87120.5	48635.7	53286.2
3.41	1077590	758028	358925	355906	240951	186191	188957	266730	172589	99737.8	79938	78798.9	45460.4	48285.3
6.297	1023590	715494	339984	340613	227799	177866	179357	265223	161165	90688.7	75808.6	69890	42018.2	43278.7
11.629	969822	683808	322865	327095	215729	170374	171031	273418	157613	83190.4	71298.5	60897.1	38575.2	38485.5
21.474	913074	657738	308429	314072	205595	163558	163881	293438	162077	77081	68065.1	53169.4	35379.1	34329.5
39.655	853650	635376	284532	299146	198155	157511	157091	371602	204767	78102	70045.2	45825	33688.8	31778.4
77.861	746520	584431	278320	286144	190325	151599	151084	397274	215849	79378.7	64912.1	44729.7	29505.6	30086.4
143.78	662118	565583	270579	275821	182419	145620	146406	442678	283177	84081.8	74265.4	44117.6	29201.5	28887.7
265.52	531667	484252	251636	261330	174749	139906	140767	482526	345472	98689.3	84357	44459.2	29468	30047.2
490.31	391345	373837	225253	245375	167236	134391	134845	409784	382740	120343	96428.8	47884.9	31976.4	31496.6
905.43	301780	266315	195110	217363	157157	127558	127423	320654	338960	124606	106840	55034.1	34727.9	36962.9
1572.5	248077	198976	162920	192242	145034	119879	119429	242216	264445	118180	106149	62677.7	38832.3	41406.8
2903.9	212564	152527	135031	165317	128821	110188	108548	179168	188683	100135	100727	68575.7	42365.2	45547
5362.5	186040	125120	115421	142704	110489	99604.2	96547.2	144081	135652	82055.5	92778.3	68796.2	44659	47184.8
9902.6	161524	106098	100631	122765	93712.2	88810.8	84989.4	128153	103053	70376.5	86427.8	64369.2	46128.6	46921.2
18287	135324	90001.8	86894.4	103725	79450.8	77850.6	74109.6	121331	84762.1	64881.7	83262.2	59102.6	47648.2	46456.9
33769	106972	74432.4	72699	84406.2	66370.8	66495	63435	117345	74491.1	62458.8	79641.2	55302.9	49437.3	46322.5
62359	79125.6	58333.6	57877.8	65183.4	53813.6	53649.5	52529.5	105932	67883.7	59892	74829.9	52997.1	49878.5	46071.6
115160	53610.6	42950.9	43191.2	47041	41240.7	40765.9	40110.4	90773.2	60080.6	55448.3	66836	49091.7	48204.8	45283.3
200000	35184	30294.4	30737.6	32574.8	30395.1	29605.4	29442.3	73639.5	51474.4	49035.6	57124.3	44321.6	43986.2	41828.4

## Sheet: double Cole-Cole model paramete
double Cole-Cole model parametes
Coal grade	Sw/%	ρ/kΩ·m	m1	m2	c1	c2	τ1	τ2	R2
bituminous coal	58	44.5	0.4	1	0.56	0.72	0.09	5.6˟10-5	0.93
	76.5	18.9	0.45	1	0.49	0.7	0.5	3.3˟10-5	0.94
	94.1	15.4	0.47	1	0.4	0.51	0.3	2.6˟10-6	0.99
	95.2	17.3	0.5	1	0.44	0.52	0.07	2.2 ˟10-6	0.99
	97.1	14.8	0.53	1	0.43	0.53	0.1	3.4 ˟10-6	0.98
	98.3	15.6	0.56	1	0.34	0.53	0.29	1.3 ˟10-6	0.98
	100	14.9	0.63	1	0.26	0.6	1.05	1 ˟10-6	0.96
anthracite	42.1	1.05	0.1	1	0.1	0.7	0.03	8˟10-4	0.73
	47.4	0.99	0.23	1	0.94	0.7	0.07	3˟10-4	0.9
	57.9	0.65	0.28	1	0.8	0.42	0.13	1.6˟10-4	0.83
	78.9	0.57	0.37	1	0.64	0.45	0.19	5˟10-5	0.73
	94.7	0.43	0.49	1	0.57	0.43	0.17	2˟10-5	0.96
	97.4	0.35	0.43	1	0.46	0.37	0.23	1˟10-5	0.98
	100	0.3	0.39	1	0.62	0.4	0.15	9.1˟10-6	0.94
